# Supplementary material
Source: PubMed Central journal article supplement (PMC4178443)

## Supplemental information for Dasgupta et al. “Mutations in *SLC34A3/NPT2c* are associated with kidney stones and nephrocalcinosis”

### Supplemental Results:

#### Full case reports of novel HHRH kindreds and IH cases

The index case of **kindred A** (Fig. 1A), A/IV-1 presented at 9<sup>2/12</sup> years with leg pain when walking and progressive crura vara since age 1, which required surgical correction at age 5. She is the oldest of four children to Afghan parents, who are first-degree cousins. Her physical exam at 9<sup>1/12</sup> years revealed a weight (W) above 97<sup>th</sup> percentile, height (H) between the 90<sup>th</sup>-97<sup>th</sup> percentile, severe crura vara, flared condyles, large hands and feet, prominent sternum, carious teeth, no enamel defects. Her pubertal development was Tanner breast 3. On presentation, her total calcium (Ca) and ionized Ca (iCa) were normal at 2.4 mmol/l (2.4-2.65) and 1.28 mmol/l (1.1-1.35), respectively, she was hypophosphatemic with a phosphate (P) level of 0.77 mmol/l (1.0-1.8), her alkaline phosphatase (ALP) was elevated to 725 IU/l (<300), parathyroid hormone (iPTH) was suppressed at 1.48 pmol/l (1.6-6.9), and 1,25(OH)<sub>2</sub>D was at the upper limit of normal at 155 pmol/l (48-160) in the setting of low 25OHD of 55 nmol/l (62-200). Her magnesium (Mg) 0.67 mmol/l (0.73-1), creatinine (Crea) 39 μmol/l (33-68), uCa/Crea ratio 0.86 mol/mol (<0.85) were normal, while tubular reabsorption of phosphate (TRP) of 82% was inappropriately low in the context of hypophosphatemia (>90%). There was no glucosuria, proteinuria, or aminoaciduria. Intact fibroblast growth factor 23 (iFGF23) level was undetectable. On treatment with 20 mg/kg/d of elemental phosphorus, calcitriol 12 ng/kg/d her ALP improved to 585 IU/l, but she developed hypercalciuria; uCa/Crea was 1.28 mol/mol (<0.85) and her renal ultrasound revealed extensive nephrocalcinosis. After discontinuation of calcitriol while continuing treatment with 20 mg/kg/d of elemental phosphorus, her laboratory findings at age 10<sup>1/12</sup> years improved to ALP 491 U/l, 1,25(OH)<sub>2</sub>D 136 pmol/l and uCa/Crea 0.5 mol/mol. The proband's 7-year old brother, A/IV-2, had no clinical symptoms, but nephrocalcinosis was observed on renal ultrasound and ALP was elevated at 342 IU/l (<300). The 2<sup>4/12</sup> year old sister, A/IV-3, presented with crura vara but had no other rachitic signs and renal ultrasound was normal. Her laboratory results showed an elevated ALP 492 (<300), suppressed iPTH of 1.06 pmol/l (1.6-6.9), and an elevated uCa/Crea ratio of 1.35 mol/mol (<1.00). There was no glucosuria, proteinuria, or aminoaciduria. Intact FGF23 was below the detection limit. The 1 year-old brother, A/IV-4, had a normal physical examination, normal renal ultrasound and his labs were normal with the exception of ALP that was elevated at 320 IU/l (<300). The father, A/III-1, and mother, A/III-2, were healthy and had normal renal ultrasounds.

#### Additional information on kindred A

**A/IV-1, index case, age 10<sup>1/12</sup> years:** On treatment with sodium-phosphate 20 mg/kg/d, calcitriol 12 ng/kg/d ALP improved to 585 IU/l, and she developed hypercalciuria; uCa/Crea 1.28 mol/mol (<0.85). After discontinuation of calcitriol while continuing treatment with sodium phosphate 20 mg/kg/d, her laboratory findings at age improved further; ALP decreased to 491 U/l. On this therapy, 1,25(OH)<sub>2</sub>D initially decreased to 136 pmol/l and uCa/Crea improved to 0.5 mol/mol, but subsequently 1,25(OH)<sub>2</sub>D again increased 226 pmol/l at 10<sup>4/12</sup> years and 284 pmol/l at 10<sup>7/12</sup> years, presumably due to noncompliance with therapy. On therapy, P ranged from 0.65 to 1.15 mmol/l and TRP decreased further to 73.1%.

**A/IV-2, brother, age 7 years:** Additional laboratory findings include Ca 2.52 mmol/l (2.40-2.65), P 1.15 mmol/l (1.00-1.8), iCa 1.28 mmol/l (1.10-1.35), Crea 44  $\mu$ mol/l, suppressed iPTH of 1.27 pmol/l (1.60-6.90), 25(OH)D 77 nmol/l, 1,25(OH)<sub>2</sub>D 130 pmol/l, uCa/crea ratio 0.65 mol/mol (<0.85), TRP 95.3%.

**A/IV-3, sister, age 2<sup>4/12</sup> year:** Additional clinical information: 75-90<sup>th</sup> percentile for W and 25-50<sup>th</sup> percentile for H, HC 10-25<sup>th</sup> percentile. Additional laboratory results were; Ca 2.41 mmol/l (2.4-2.65), ion. Ca 1.31 mmol/l, low P 0.87 mmol/l, Mg 0.75 mmol/l (0.73-1.0), Crea 24  $\mu$ mol/l, 25(OH)D 40 nmol/l, 1,25(OH)<sub>2</sub>D 99 pmol/l (48-160). ALP improved to 243 U/l under treatment with 20 mg P/kg/d and calcitriol 11.4 ng/kg/d, but her hypercalciuria persisted with a uCa/Crea ratio of 1.36 mol/mol (<1.00). Her hypercalciuria worsened to 2.2 mol/mol after accidentally adding 2500 IU cholecalciferol/day to her regimen, and 25(OH)D and 1,25(OH)<sub>2</sub>D increased to 168 nmol/l and 255 pmol/l, respectively, as a result of which all vitamin D analogs were stopped.

**A/IV-4, brother, age 1 year:** Additional labs were Ca 2.39 mmol/l (2.4-2.65), P 1.26 mmol/l (1.00-1.8), a low ion. Ca of 0.93 mmol/l (1.1-1.35), elevated ALP at 320 IU/l (<300), Crea 31  $\mu$ mol/l (20-65), iPTH 2.54 pmol/l (1.6-6.9), 25(OH)D 19 nmol/l, 1,25(OH)<sub>2</sub>D 90 pmol/l, uCa/Crea 0.52 mol/mol (<1.27), TRP 92.5%.

**A/III-1, father, age 34 years:** H was 185.0 cm, additional labs were Ca 2.39 mmol/l (2.1-2.55), P 1.02 mmol/l (0.84-1.45), Crea 92  $\mu$ mol/l (59-104), ALP 71 U/l (40-130), uCa/Crea 0.19 mol/mol (<0.62), TRP 89%, no glucosuria, proteinuria, or aminoaciduria, and his renal US was normal.

**A/III-2, mother, age 29 years:** H was 158.0 cm, her laboratory studies were: Ca 2.31 mmol/l (2.1-2.55), P 0.86 mmol/l (0.84-1.45), Crea 59  $\mu$ mol/l (45-84), ALP 72 U/l (35-105), uCa/Crea 0.38 mol/mol (<0.62), TRP 91.4%, no glucosuria, proteinuria, or aminoaciduria.

The index case in **kindred B** (Fig. 1 B), B/II-2, the younger of two children from non-consanguineous Caucasian parents, presented at 11 years of age with an elevated ALP of 675 IU/L (reference range 50-350) incidentally found during investigation for vasovagal syncope. He previously fractured his left femur in a skateboard park at age 6 years, sustained a greenstick fracture of his left forearm at age 8 years, and a displaced left radial fracture at age 12 years while snowboarding. His P was slightly reduced at 0.94 mmol/L (1.20-1.74) and his 25(OH)D was 44 nmol/L (51-250). No further action was taken for a two-year period apart from monitoring his ALP, which fluctuated between 650-820 U/L until age 13 years when he was referred to one of us for investigation of his persistently elevated ALP, bone pain and recurrent fractures. Repeat blood tests at this time showed an ALP of 769 U/L despite a meanwhile improved 25(OH)D level of 71 nmol/L, but his serum P was low 0.90 mmol/L (1.20-1.74), 1,25(OH)<sub>2</sub>D was elevated 419 pmol/L (60-158), while Ca, Crea, and iPTH levels were within normal limits. TmP/GFR of 0.98 mmol/L (0.77-1.29) and TRP 84% were inappropriate in the setting of hypophosphatemia. Calcium excretion was at the upper limit of normal with an uCa/Crea ratio of 0.507-0.706 mol/mol (<0.73) and 24hr Ca excretion was 4.8 mmol/day (1-7). His bone mineral densitometry showed a total hip BMD z-score of -3.6, spine BMD z-score of -1.6, and whole body bone mineral z-score of -6.1. On examination B/II-2 appeared well. He was not dysmorphic and had no birthmarks. He had been growing adequately; his latest height was 162.3cm (75<sup>th</sup>

percentile) with a weight of 53.9kg (77<sup>th</sup> percentile). He had normal sclerae and dentition, hypermobile fingers, hyperextensible knees, bilateral pes planus and calcaneovalgus. His spine was straight. General clinical examination was otherwise unremarkable, he was normotensive, and renal ultrasound was unremarkable. The parents (B/I-1 and I-2) and an older brother (B/II-1) were well and revealed normal biochemistries as shown in Figure 1B, with the exception of an elevated 1,25(OH)<sub>2</sub>D level for father and brother of 218 and 172 pmol/L (60.00-158.00), respectively. There is no family history of renal stones.

The index case of **kindred C** (Fig. 1 C), C/III-1, presented at age 5 years, following an earlier history of nephrolithiasis at age 3, managed with low calcium intake and hydration. Upon referral to endocrinology, a more complete evaluation was performed revealing hypophosphatemia of 1 mmol/L (1.39-1.74). His 1,25(OH)<sub>2</sub>D was also elevated at 343.20 pmol/L (52-163.80), as was his urine Ca/Crea ratio at 1.90 mol/mol (<0.66). TmP/GFR was 0.74, and TRP was low at 76%(>90%). His remaining biochemical findings were within normal limits: 25(OH)D 84.86 nmol/L (24.96-169.73), serum Ca 2.40 mmol/L (2.13-2.63), serum Crea 44.23  $\mu$ mol/L (17.63-52.88). His kidney stones required lithotripsy at age 4, since he had experienced mild back pain. He had had fracture of the radius and ulna after a fall but was otherwise healthy. Radiographs at that time revealed osteopenia and widened growth plates suggestive of “early rickets.” His physical examination revealed a normal child at the 10<sup>th</sup> centile for both height and weight. A DXA scan revealed a lumbar spine BMD Z score of -1.9 (at age 5). His father, C/II-2, age 37, developed renal stones at age 32, and reported intermittent symptoms, but was otherwise healthy. His labs were: Ca 2.38 mmol/L (2.13-2.63), P 1.03 mmol/L (0.87-1.45), Crea 88.14 mmol/L (70.512-114.58), iPTH 12.94 pmol/L (5.30-34.99), 1,25(OH)<sub>2</sub>D 135.20 pmol/L (52-163.80), Urine Ca/Crea 0.33 mol/mol (<0.66), TmP/GFR at 0.86 mmol/L (0.89-1.08), TRP of 85% (>90%). The mother, C/II-1, age 32 years was healthy. Her biochemical findings upon presentation were: Ca 2.45 mmol/L (2.13-2.63), P 1.13 mmol/L (0.87-1.45), Crea 70.51 mmol/L (52.88-96.95), iPTH 13.47 pmol/L (5.30-34.99), 1,25(OH)<sub>2</sub>D 67.60 pmol/L (52-163.80), U-Ca/U-Crea 0.36 mol/mol (<0.66), TmP/GFR 1.08 mmol/L (0.89-1.08), and a TRP of 90% (>90%). His sister, C/III-2, 3 years of age, carried a diagnosis of juvenile rheumatoid arthritis, although this was mild. She had one episode of hematuria but no evidence of renal stones. Her biochemical findings upon presentation were: serum Ca 2.43 mmol/L (2.13-2.63), serum P 1.39 mmol/L (1.39-1.74), Crea 44.07 mmol/L (8.81-35.26), iPTH 11.03 pmol/L (5.30-34.99), 1,25(OH)<sub>2</sub> vitamin D of 122.20 pmol/L (52-163.8), urinary Ca/Crea of 0.46 mol/mol (<0.66), a TmP/GFR of 1.42, and a TRP of 92% (>90%). A younger sister (1 yr of age) was reportedly normal. A paternal grandmother had a history of kidney stones. No further information is available.

The index case of **kindred D** (Table 2 B), D/I-1, first presented at age 27 years 6 months to one of us. Her medical history started at 12 months of age when she developed bilateral genua valga and rickets, which required several years of bracing both lower extremities to prevent further valgus deformities. At age 11 she sustained a hairline fracture of the left elbow as well as a greenstick fracture of the right wrist. No laboratory studies are available from until age 16.6 years, when her uCa/Crea was elevated to 1.38 mol/mol (<0.74) and TRP was 88% (<90). At presentation age 27 she reportedly had asymptomatic hypercalciuria, P was reduced to 0.78 mmol/L (0.81-1.45) and 1,25(OH)<sub>2</sub> was elevated at 228 pmol/L (35-140). All other biochemical findings were normal: Ca 2.29 mmol/L (2.12-2.54), Crea 51  $\mu$ mol/L (60-124), 25(OH)D 48.6 nmol/L (40-130), iPTH 0.74 pmol/L (1.06-5.83), ALP 240 (U/L) (50-276). Physical examination at age 27 showed a height of 157.5 cm, a slightly enlarged thyroid gland but was otherwise nor-

mal. There is no family history of rickets or any other bone disease. Follow up biochemical findings at age 41 off treatment with phosphate supplements showed hypophosphataemia 0.73 mmol/L (0.80-1.50) and low 25(OH)D of 72.2 nmol/L (80.0-200.0), hypercalciuria of 9.48 mmol/d (2.50-7.50), uCa/Crea 0.92 mol/mol (<0.45) and TRP 58%, while the remaining biochemical findings were normal: Ca of 2.51 mmol/L (2.10-2.55), iPTH 0.74 pmol/L (1.1-5.81), 25(OH)<sub>2</sub>D 123 pmol/L (55-190), ALP 56 U/L (30-115). The proband's son, D/II-2, age 16 months, H 78.5 cm (just below 50<sup>th</sup> percentile), W 9.1 kg (<3<sup>rd</sup> percentile, but less than 1 standard deviation below) suffers from Poland Syndrome (acquired hypoplasia of the pectoralis muscle) but is otherwise asymptomatic with respect to skeletal development and there is no history of renal stones. His available biochemical findings include Ca 2.42 mmol/L (2.20-2.60), P 1.53 mmol/L (1.39-1.74), a low Crea of 12 μmol/L (20-60), ALP 194 U/L (40-390), a depressed 25(OH)D of 46.2 nmol/L (80-200), 1,25(OH)<sub>2</sub>D 172 pmol/L (55-190). The proband's daughter, D/II-1 was likewise well until age 9 years and renal or bone malformations are absent, but further studies are unavailable.

The index case of **kindred E** (Table 2 B), E/II-2, presented at age 6 with kidney stones and nephrocalcinosis. At age 13<sup>1/12</sup> years his H: 155 cm, W: 48 kg (50-75<sup>th</sup> percentile for weight and 25-50<sup>th</sup> percentile for height) His u-Ca/Crea ratio was 1.03 mol/mol (<0.74) and 1,25(OH)<sub>2</sub>D 437 pmol/L (26-156) were elevated, while the remaining biochemical findings included normal Ca 2.33 mmol/L (2.20-2.60), P 1.1 mmol/L (1.29-1.68), Crea 55 μmol/L (35.26-61.70), 25(OH)D 119 nmol/L (25-125), iPTH 0.63 pmol/L (1.06-6.89), ALP 966 U/L (150-900), TmP/GFR 1.18 (0.77-1.29), and TRP was 107% (>90). Ultrasound and CT scan of his kidneys confirmed nephrocalcinosis, a 1.5 cm large cyst in the left kidney. On phosphate supplements (300-600 mg 5 times daily) he had no further episodes of kidney stones, and his DEXA-scan, which reportedly showed low bone density initially, but normalized 4 years after start with oral phosphate (Z-score -0.1 for spine and hip). At age 24 he developed gallstone pancreatitis, which resolved after cholecystectomy and papillotomy of the pancreatic duct. The proband's mother, E/I-1, age 53 years, H 174 cm, W 76.9 kg, has a history of kidney stones/nephrocalcinosis, rheumatoid arthritis, Sjögren Syndrome, hyperparathyroidism and thyrotoxicosis and underwent thyro-parathyroidectomy. Her biochemical findings were within normal limits including Ca 2.14 mmol/L (2.20-2.60), P 1.1 mmol/L (0.6-1.5), Crea 74 mmol/L (52.88-96.95), iPTH 1.27 pmol/L (1.06-6.89), ALP 240 U/L (50-276), u-Ca/Crea ratio 0.50 mol/mol (<0.45), 25(OH)D 62 nmol/L (25-125), 1,25(OH)<sub>2</sub>D 104 pmol/L (26-156), TmP/GFR was 0.9 (0.77-1.29), and TRP was 90% (>90%). The proband's father, E/I-2, age 56 years, H 175 cm, W 80 kg, is healthy, with no renal abnormalities, bone pain, or fractures. Ca 2.22 mmol/L (2.20-2.60), P 0.8 mmol/L (0.6-1.5), Crea 103 U/L (70.51-114.58), iPTH 3.92 pmol/L (1.06-6.89), ALP 210 U/L (50-276), u-Ca/Crea ratio 0.11 mol/mol (<0.45), 25(OH)D 63 nmol/L (25-125), 1,25(OH)<sub>2</sub>D 146 pmol/L (26-156), TmP/GFR was 0.7 (0.77-1.29), and TRP was 87% (>90%). The proband's sister, E/II-1, H 166.5 cm, W 59.2 kg, has malignant melanoma diagnosed age 24, no history of kidney stones, rickets, bone pain, or fractures. Her biochemical findings were normal Ca 2.58 mmol/L (2.20-2.60), P 1.0 mmol/L (0.6-1.5), Crea 72 mmol/L (52.88-96.95), iPTH 0.45 pmol/L (1.06-6.89), ALP 510 U/L (150-900), u-Ca/Crea 0.67 mol/mol (<0.74), 25(OH)D 99 nmol/L (25-125), 1,25(OH)<sub>2</sub>D 119 pmol/L (26-156), TmP/GFR was 0.77 (0.77-1.29), and TRP was 77%(>90??%). The proband's paternal uncle has recurrent kidney stones. Also her paternal great-grandfather (deceased at 93 years) had kidney stones.

**Case F** presented at age 6 with pyelonephritis, subsequent evaluation showed hypercalciuria 6-10 mg/Kg/day, low P 1.11 mmol/L (1.16-1.91), but normal Ca 2.57 mmol/L (2.40-2.65), Crea 33.49 umol/L (17.63-44.07), PTH 1.38 pmol/L (1.60-6.90). Renal ultrasound showed grade 2-3 nephrocalcinosis. Therapy at the time consisted in oral potassium citrate (Shohl's solution). At age 6.7 her height was 118.4cm (P43), weight 20.7 kg (P28), at the time laboratory studies showed Crea 44.07 umol/L (17.63-44.07), P 1.23 mmol/L (1.16-1.91), S-Ca 2.6 mmol/l (2.40-2.65), 25(OH)D 24.25 nmol/L (62.4-199.68), 1,25(OH)2-D 174 pmol/L (62.4-223.6), PTH 0.4 pmol/L (1.60-6.90), u-Ca/Crea 1.51-1.56 mol/mol (<0.85), uOxalat/Crea 50mg/g (24-56), uCitrat/Crea 1905mg/g (>180). At this age hydrochlorothiazide 12.5 mg bid was added. Repeat laboratory studies showed iCa 1.26 mmol/L (1.15-1.33), Ca 2.5-2.6 mmol/L (2.40-2.65), P 1.09-1.29 mmol/L (1.16-1.91), u-Ca/Crea 1.11 mol/mol (<0.85), c-terminal FGF23 (cFGF23) 21-28 kRU/l (26-110), 25-OH-D 65 nmol/L (62.4-199.68), 1,25-OH2-D 209 pmol/L(62.4-223.6), PTH 0.74 pmol/L (1.60-6.90). Her mother was found to have hypercalciuria 4.7 mg/kg/d (<4) but no evidence was seen for nephrocalcinosis on ultrasound. Father and sister had no laboratory abnormalities and there was no family history for symptomatic nephrolithiasis. There is, however, a family history of osteoporosis in mother's mother, mother's aunt and their mother (mother's grandmother).

**Case G** presented age 11 with renal colic due to a right urethral-bladder junction stone. Her weight was 30.7kg (P21), height 142.5cm (P58). Subsequent ultrasonographic evaluation showed grade 2-3 nephrocalcinosis, Ca 2.63mmol/l (2.40-2.65), P 1.26 mmol/L (1.16-1.91), Crea 88.14 umol/L (35.26-61.69), suppressed iPTH <0.3 pmol/L (1.60-6.90), 25-OH-D 45 nmol/L (62.4-199.68), elevated 1,25-OH2-D 283 pmol/L (62.4-223.6) and uCa/Crea 0.86 (<0.85). A 24h-urine collection showed a Ca excretion of 3.8 mmol (1-7), uOxalate/Crea 33 mg/g (24-56), uCitrate/Crea 417 mg/g (>180). Treatment consisted of lithotripsy and pig-tail placement. Stone analysis showed calcium-oxalate (95% Weddellit, 5% Whewellit). Subsequently her renal function improved. Repeat laboratory analyses showed Ca 2.6 mmol/l (2.40-2.65), P 1.22 mmol/L (1.16-1.91), Crea 70.5 umol/L (35.26-61.69). However, she continued to have elevated uCa/Crea 1.48 (<0.85) and low TmP/GFR = 1.17 mmol/L (1.22-1.61). Since she had low U-citrate 183mg/l, therapy with 8.8 mmol potassium citrate bid was started and laboratory studies three months later showed: Ca 2.6 mmol/l (2.40-2.65), P 1.19 mmol/L (1.16-1.91), Crea 70.5 umol/L (35.26-61.69), ALP 358 U/l (215-476), suppressed iPTH 0.63 pmol/L (1.60-6.90), cFGF23 was 28-33kRU/l (26-110), 25-OH-D 56.75 nmol/L (62.4-199.68), 1,25-OH2-D 153 pmol/L (62.4-223.6), uCa/Crea 1.44 (<0.85), uOxalate/Crea 28 mg/g (24-56), uCitrate/Crea 666 mg/g (>180), TmP/GFR = 1.04 mmol/L (1.22-1.61). Laboratory followup 12 months later showed: Ca 2.5mmol/l (2.40-2.65), P 1.19 mmol/L (1.16-1.91), Crea 79.3 umol/L (35.26-61.69), ALP 307 U/l (178-526), iPTH 1.47 pmol/L (1.60-6.90), 25-OH-D 33.75 nmol/L (62.4-199.68), 1,25-OH2-D 153 pmol/L (62.4-223.6), bone age was 11 ½ years and ultrasound showed unchanged nephrocalcinosis. Her family history was negative for nephrolithiasis. A maternal second degree cousin reportedly had vitamin D deficient rickets.

### **Nucleotide sequence analysis of the *SLC34A3*/NPT2c gene of kindreds C-E, and case F**

Sequence analysis of five additional cases with HHRH or IH revealed previously described mutations in *SLC34A3*/NPT2c (see detailed case descriptions in Supplemental Results and Supplemental Fig. S-1). Three heterozygous sequence variations were found in the proband of kindred C (C/III-1): c.413C>T(p.S138F), c.1304delG, c.1579\_81del(p.L527del). The frameshift mutation

c.1304delG was inherited from the father, while c.413C>T(p.S138F) was inherited from the mother. Both parents carry the deletion c.1579\_81del(p.L527del); c.1579\_81del(p.L527del) and c.413C>T(p.S138F) were previously described in an unrelated kindreds with HHRH by us <sup>1</sup> and c.413C>T(p.S138F) was subsequently annotated as a rare single nucleotide polymorphism (rs141734934, MAF 0.001 in 4352 chromosomes) in dbSNP <sup>2</sup>. c.1304delG was also found in an unrelated individual <sup>3</sup> and introduces 45 novel amino acids followed by premature termination of the NPT2c protein after residue p.A434 (TPQTGC SAPCRSPSSSTSSST-WPASCCGTWCLHCGCPSRWPGTSGW-Stop). Additional genotype information of the index cases C/II-1 includes a novel heterozygous single nucleotide polymorphism c.558G>A(p.Q186Q). Proband D/I-1 was found to carry a homozygous missense mutation, c.1402C>T (p.R468W), which was previously described in a compound heterozygous HHRH case <sup>4</sup>. Proband E/II-2 was found to be homozygous for a previously described mutation c.575C>T (p.S192L) <sup>1, 4</sup> that she inherited from her two parents. Case F was found to carry two known *SLC34A3*/NPT2c mutations: c.575C>T (p.S192L) <sup>1, 4</sup> and c. 1093+41\_1094-15del (g.2615\_2699del) <sup>5</sup>.

**Supplemental Figure S-1A: Clinical and biochemical characteristics of kindreds A, B**

**Supplemental Figure S-1B: Clinical and biochemical characteristics of kindreds C-G.**

Laboratory findings in patients with hereditary hypophosphatemic rickets with hypercalciuria (HHRH) or idiopathic hypercalciuria (IH) caused by novel *SLC34A3* mutations. All abnormal values are shown in bold. Circles denote females, squares denote men. Black symbols indicate affected individuals, who presented with hypophosphatemia, hypercalciuria, elevated 1,25(OH)<sub>2</sub> vitamin D levels, and skeletal findings consistent with rickets, while gray symbols indicate affected individuals, who had one or more of the above biochemical abnormalities and nephrocalcinosis. Open symbols indicate healthy individuals. Abbreviations are as follows: ALP, alkaline phosphatase; uCa/Cr, urinary calcium/creatinine ratio; PTH; parathyroid hormone; Tmp/GFR, maximum tubular phosphate reabsorption per glomerular filtrate; TRP, tubular phosphate reabsorption; 1,25(OH)<sub>2</sub>D, 1,25(OH)<sub>2</sub> vitamin D; 25(OH)D, 25(OH) vitamin D. The normal range for TRP is >90% in the setting of hypophosphatemia.

**Supplemental Figure S-2: Biochemical and renal phenotype of frequent *SLC34A3*/NPT2c mutations.**

Legend: Representation of biochemical and renal phenotype (1=nephrocalcinosis, 2=stones, 3=nephrocalcinosis and stones) of individual mutations, which were observed in two or more individuals affecting one allele (het) or both alleles (hom). See Methods and legends of Fig. 2 and 3 for abbreviations, normalization and RVs of biochemical data and Table S-1 for the data table.

**Supplemental Table S-1: *SLC34A3*/NPT2c mutations and nucleotide sequence variants of the index cases of kindreds A and B, and of case G**

| Sample | Exon/<br>Intron | Flanking Sequence | Nomenclature | dbSNP/1000<br>genome | primers | Kit | AT<br>°C | Band<br>size<br>(bp),<br>detection |
|--------|-----------------|-------------------|--------------|----------------------|---------|-----|----------|------------------------------------|
|        |                 |                   |              |                      |         |     |          |                                    |

|        |           |                                                                                                        |                                         |                                        |         |      |    |            |
|--------|-----------|--------------------------------------------------------------------------------------------------------|-----------------------------------------|----------------------------------------|---------|------|----|------------|
| A/II-1 | Intron 12 | ccccctg-gaaccac(g/c)ctcgttcttctg cc                                                                    | Hom.c.1336-549G>C                       | rs28368709                             |         |      |    |            |
|        | Exon 13   | TTCTTCAAC-CTGGCC(G/A)GCATC CTGCTGTGGT                                                                  | Hom.c.1369G>A (p.G457S)                 | Novel missense mutation                | 52, 276 | Ex.1 | 55 | 267, seq.  |
|        | Intron 13 | GAcgggcagtt-gctg(a/c)gcagaccgccccac c                                                                  | Hom.c.1800+14A>C                        | rs28591989                             |         |      |    |            |
| B/II-2 | 5'UT R    | ctcccgcce(g/a)tgtctcctcc                                                                               | Hom.c.1-804G>A                          | rs9777338                              |         |      |    |            |
|        | Intron 6  | tgtgggtg-gaaggctgggc(tggggctgca gtgg-cagccccagccccgggc/del tggggctgcagtgg-cagccccagccccgggc)cccc cacct | Het.c.560+27_561-38del (g.1440-1469del) | Known intronic deletion <sup>6</sup>   | 734-735 | Ex.1 | 55 | 208+179 bp |
|        | Intron 12 | ccccctg-gaaccac(g/c)ctcgttcttctg cc                                                                    | Hom.c.1336-549G>C                       | rs28368709                             |         |      |    |            |
|        | Exon 13   | ATCCAC-TTCTTC(TTC/ del-TTC)AACCTGGCC                                                                   | Het.c.1357delTTC (p. F453del)           | Novel microdeletion                    | 41-276  | Ex.1 | 55 | 571, seq.  |
|        | Exon 13   | TGGCAGGGGG-CATGG(A/T)GCTGGC CGCTGTCGG                                                                  | Hom.c.1538A>T (p.E513V)                 | rs28542318                             |         |      |    |            |
|        | 3'UT R    | Gcagtt-gctg(a/c)gcagaccgcc                                                                             | Hom.c.1800+14A>C                        | rs28591989                             |         |      |    |            |
| Case G |           | GTGGCTG-GACTGGT(C/delC)ATT GGCGTGCTGGTC                                                                | Het.c.367delC                           | Novel deletion                         |         |      |    |            |
|        |           | CTTTCAGCGGCT(C/T) GGCGGTGCACGG-GAT                                                                     | Het. c.575C>T(p.S192L)                  | Known missense mutation <sup>4</sup> . |         |      |    |            |

## Supplemental Table S-2: Review of current and previously published HHRH kindreds.

Legend: Comprehensive table of all the available information collated from published and unpublished cases of HHRH and their families. Conversion into SI units is given where mass units were initially reported. Conversion factors were taken from [www.endmemo.com/medical/unitconvert/](http://www.endmemo.com/medical/unitconvert/), with the following exceptions: PTH conversion factor was taken from [www.parathyroid-forum.co.uk/](http://www.parathyroid-forum.co.uk/), and the TmP-GFR conversion factor was taken from [www.mayomedicallaboratories.com/test-catalog/Clinical+and+interpretive/](http://www.mayomedicallaboratories.com/test-catalog/Clinical+and+interpretive/). For Ca/Crea, where the Mayo Clinic RVs ([www.mayomedicallaboratories.com/test-catalog/Clinical+and+interpretive/](http://www.mayomedicallaboratories.com/test-catalog/Clinical+and+interpretive/)) were used after conversion to SI using the factor 0.25/0.07626 (=3.278) was used to convert these to SI units where the paper presents the biochemical data in mass units. Where age-specific RVs were missing from the papers and for Braithwaite et al. <sup>7</sup>, the Mayo Clinic age-adjusted RVs were used. For TmP/GFR, the RVs from the Alon & Hellerstein paper (1994) were used when not provided in the original publication. The daughter of index II-1 was subsequently genotyped [c.145C>T(p.Q49\*)], and her biochemical lab values were included in the systematic meta-analysis <sup>8</sup>.



**Supplemental Table S-3: Clustal-W sequence alignment of novel *SLC34A3* mutations (c.1357delTTC (p.F453del); c.G1369A (p.G457S)).**

c.G1369A (p.G457S)  
c.1357delTTC (p.F453del)

```

ENSOGAP0000000671/1-638 YPLTLGSNIGT-TTTAILAALASPR--EKLSSSFQIALCHFFFNISGI-LWYPVPCTR-
ENSMGAP00000013100/1-674 YPLTLGANIGT-TTTAILAALASPG--STLKYSLQIALCHFFFNVSIGI-ILFYPLPFTR-
ENSP000000442397/1-599 YPLLLGSNIGT-TTTALLAALASPA--DRMLSALQVALIHFFFNLAG-ILLWYLVPALR-
ENSAMEP00000019187/1-641 YPLTLGSNIGT-TTTAILAALASPR--EKLSSSFQIALCHFFFNISGI-LLWYPVPCTR-
ENSACAP00000006271/1-622 YPLTLGSNMG-TTTAILAALASPG--EKLASAFQIALCHFFFNLSIGI-LLWYPLPCSR-
ENSOANP00000015354/1-519 YPLTLGSNIGT-TTTAILAALASPG--DKLASAFQVGRCHFFFNISGI-LLWYPLPCTR-
ENSCAFP000000028785/1-591 YPLFLGSNIGT-TTTALLAALASPA--DMLSALQVALIHFFFNLAG-ILLWYVVPVLR-
ENSCAFP000000024164/1-694 YPLTLGSNIGT-TTTAILAALASPG--NLRSSLQIALCHFFFNISGI-LLWYPIPFTR-
ENSCPOP00000003644/1-638 YPLTLGSNIGT-TTTAILAALASPR--EKLSSSFQIALCHFFFNISGI-LLWYPLPCMR-
ENSMEUP00000010653/1-640 YPLTLGSNIGT-TTTAILAALASPR--EKLSSAFQIALCHFFFNISGI-LLWYPLPCTR-
ENSGACP00000002260/1-595 YPLTLGSNIGT-TTTAILAAMASPG--ETLANSLQIALCHFFFNIMGI-LLWYPIPFTR-
ENSMODP000000038338/1-529 YPLILGSNIGT-STITILAALSGPR--NALRKSFQVTLCHFLFNLF- ILLWYPIGMR-
ENSPTRP000000027486/1-690 YPLTLGSNIGT-TTTAILAALASPG--NALRSSLQIALCHFFFNISGI-LLWYPIPFTR-
ENSEEUP00000007494/1-562 YPLFLGSNIGT-TTTAVXXXXXXXXX--XXXXXXXXXVALIHFFFNLAG-ILLWYVVPVLR-
ENSFALP00000009130/1-620 YPLTLGSNIGT-TTTAILAALASPG--DKLASSFQIALCHFFFNISGI-LLWYPLPFTR-
ENSPVAP00000007920/1-601 YPLLLGSNVGT-TTTALLAALASPS--RTLHFQIALCHFFFNVTG-IVLWYVVPVLR-
ENSMGAP00000004094/1-668 YPLTLGSNIGT-TTTAILAALASPG--DKLASSFQIALCHFFFNISGI-LLWYPLPFTR-
ENSTBEP000000027461/1-305 YPLFLGSNIGT-TTTALLAALASPA--AMLPSAVQVALIHFFFNLAG-ILLWYLVPTLR-
ENSMPOP00000012027/1-639 YPLTLGSNIGT-TTTAILAALASPR--EKLSSSFQIALCHFFFNISGI-LLWYPVPCTR-
ENSXMAP00000017507/1-643 YPLSLGSNIGT-TTTAILAAMASPG--DRLANALQIALVHFLFNISGI-ILWYPIPFTR-
ENSCJAP00000012722/1-639 YPLTLGSNIGT-TTTAILAALASPR--EKLSSAFQIALCHFFFNISGI-LLWYPVPCTR-
ENSSHAP00000005319/1-697 YPLTLGSNIGT-TTTAILAALASPG--STLHNSLQISLCHFFFNVSGI-ILWYVPVPMR-
ENSDARP00000123811/1-525 YPLTLGSNIGT-TTTAILAGLASPG--DKLAAAFQVALCHFI FNILGI-LLWYVPVPHR-
-----
ENSMUP00000019963/1-603 YPLTLGANIGT-TTTAIMAALASPG--KTLRSSLQIALCHFFFNITGI-LLWYVPVPTLR-
ENSPTRP00000043446/1-349 YPLLLGSNIGT-TTTALLAALASPA--DRMLSALQVALIHFFFNLAG-ILLWYLVPALR-
ENSGACP00000021060/1-609 YPLSLGSNIGT-TTTAILAAMASPG--DTLGNALQIALVHFLFNISGI-ILWYPIPFTR-
ENSCINP00000017272/1-603 YPLTLGANIGT-TTTSILAALAQ----DEIANALQIAFCHFFFNIFG- ILLWYPIPFMRN
ENSOANP00000010689/1-696 YPLTLGSNIGT-TTTAILAALASPG--STLKNLQISLCHFFFNISGI-LLWYPIPFTR-
ENSMODP00000021461/1-621 YPLFLGSNIGT-TTTALLAALASPA--DMLSASVQVSLIHFFFNLAG-ILLWYLVPTLR-
ENSP000000321424/1-639 YPLTLGSNIGT-TTTAILAALASPR--EKLSSAFQIALCHFFFNISGI-LLWYPVPCTR-
ENSPYP00000016368/1-690 YPLTLGSNIGT-TTTAILAALASPG--NALRSSLQIALCHFFFNISGI-LLWYPIPFTR-
ENSGMOP00000006752/1-564 YPLTLGSNIGT-TTTALLAALASPG--DQLAPALQIALCHLFFNVLGI-LLWYPIPATR-
ENSPCAP00000005941/1-683 YPLTLGSNIGT-TTTSILAALASPG--NTLKSSLQIALCHFFFNISGI-LLWYPIPFTR-
ENSPVAP00000008764/1-701 YPLTLGANIGT-TTTAIMAALASPG--NTLKSSLQIALCHFFFNITGI-LLWYPIPFTR-
ENSETEP00000011673/1-591 YPLFLGSNIGT-TTTALLAALASPS--NMLLDALQVALIHFFFNVAG-ILLWYVVPALR-
ENSCINP00000011241/1-583 YPLTLGANIGT-TTTGIFTALASEP--ERLEYSLQALVHFLFNISG-ILLWYPIPLMRR
ENSTGUP00000009608/1-675 YPLTLGANIGT-TTTAILAALASPG--STLKYSLQIALCHFFFNVSGI-ILFYPIPYTR-
ENSDORP00000008855/1-593 XXXXXXXXXXXX-XXXXXXXXXXXXX--XXXXXXXXXVALIHFFFNLAGI-LLWYTVPVLR-
-----
ENSMICP00000013235/1-391
ENSMICP00000015680/1-671 YPLTLGSNIGT-TTTAILAALASPG--NLRSSALQXXXXXXXXXXXXXXXXX-XXXXXXXXXX
ENSNLEP00000011130/1-551 YPLLLGSNIGT-TTTALLAALASPA--DRMLSALQVALIHFFFNLAG-ILLWYLVPALR-
ENSGGOP00000027403/1-689 YPLTLGSNIGT-TTTAILAALASPG--NALRSSLQIALCHFFFNISGI-LLWYPIPFTR-
ENSXMAP00000008745/1-651 YPLTLGSNIGT-TATALLAALASPG--NKIVASIQIALCHLFFNVFVGI-LLWYVPVPMR-
ZK563.2/1-573 YPLVLGSNIGT-TFSGVLAAFSTDP--SRFEKALHMAMCQVIYNIIG-TCLFYIVPCTR

```

ENSECAP0000000385/1-541 YPLFLGSNIGT-TTTALLAALASPA--DMLLSAVQALSSFLFGSPSSLPOGAPVP----  
ENSM LUP00000008643/1-639 YPLTLGSNIGT-TTTAILAALASPR--EKLSSAFQIALCHFFFNISGI-LLWYPVPCTR-  
ENSSHAP00000011947/1-666 YPLTLGSNIGT-TTTAILAALASPG--STLRNSLQIALCHFFFNVSGI-LLWYPVPFTR-  
ENSSHAP00000012725/1-215 -----  
ENSCJAP00000024604/1-689 YPLTLGSNIGT-TTTAILAALASPG--SSIKSSLQIALCHFFFNISGI-LLWYPIPFTR-  
ENSMUSP00000059138/1-637 YPLTLGSNIGT-TTTAILAALASPR--EKLSSSFQIALCHFFFNISGI-LLWYPLPCTR-  
ENSDARP00000103592/1-681 YPLTLGSNIGT-TTTAILAAMASPG--ETLANSLOIALCHFFFNIAGI-LLWYPIPFTR-  
ENSDNOP00000007326/1-478 XXXXXXXXXXX-XXXXXXXXXXXXPG--N TLKSSL-----  
ENSDARP00000023797/1-631 YPLSLGSNIGT-TTTAILAAMASPG--ETLGNLQIALVHLFFNLSGI-LLWYPIPI TR-  
ENSMODP00000038321/1-518 YPLILGSNIGT-TTTAILAALASPA--STLQDSLQIALCHFFFNIFG-VLLWYPIPFTR-  
ENSSTOP00000011627/1-646 YPLTLGSNIGT-TTTAILAALASPG--N TLKSSLQIALCHFFFNISGI-LLWYPIPFTR-  
ENSORLP00000020360/1-639 YPLTLGSNIGT-TTTSILAAMASPG--ETLSNSLQIALCHFFFNIFGI-I IWYPLPFMR-  
ENSCSAVP00000015160/1-583 YPLTLGANIGT-TTGTIFALASEP--ARLEYSLOIALVHLFFNLSG-IVLWYVPVILRR  
ENSLAFP00000018716/1-695 YPLTLGSNIGT-TTTSILAALASPG--N TLKSSLQIALCHFFFNVSGI-LLWYPIPFTR-  
ENSTGUP00000015042/1-368 YPLTLGANIGT-TTTAILAALASPG--STLKYSLOIALCHFFFNVSGI-ILFYPIPYTR-  
ENSCSAVP00000010664/1-548 YAVTVGANMGT-TLTAVALAATGN-----SNALQAFCHFFFNING-FLLWYPLPFMR  
ENSTRP00000005760/1-637 YPLTLGANIGT-TTTAILAALASPG--STLKSSLQIALCHFFFNISGI-LLWYPIPFTR-  
ENSPTRP00000030034/1-521 YPLTLGSNIGT-TTTAILAALASPR--EKLSSAFQIALCHFFFNISGI-LLWYVPA-R  
ENSOGAP00000005733/1-689 YPLTLGSNIGT-TTTAILAALASPG--N TLRSSLQIALCHFFFNVSGI-LLFYPIPFTR-  
ENSGACP00000023831/1-585 YPLTLGSNMT-TATALLAALASPG--NKLAAAMQIAFCHLFFNVFGI-LLWYPLPVTR-  
ENSM EUP00000002431/1-614 YPLTLGSNIGT-TTTAILAALASPG--N TLQSSLQIALCHFFFNITGV-ILWYVPVYMR-  
ENSONIP00000016391/1-665 YPLTLGSNIGT-TATALLAALASPG--NKLAAAIQIALCHLFFNFING-LLWYPLPFMR-  
ENSXETP00000050672/1-599 YPLFLGSNIGT-TTTAVLAALASPA--DALSNSVQVAFIHLFFNLGT-LVLWYVVPFLR-  
ENSMODP0000005525/1-655 YPLTLGSNIGT-TTTAILAALASPR--EKLSSAFQIALCHFFFNISGI-LLWYPIPCTR-  
ENFCAP00000024487/1-693 YPLTLGSNIGT-TTTAILAALASPG--N TLRSSLQIALCHFFFNISGI-LLWYPIPFTR-  
ENSONIP0000003907/1-642 YPLTLGSNIGT-TTTSILAAMASPG--ETLDNSLQIALCHFFFNIFGI-VLWYPIPFMR-  
ENFCAP00000001426/1-639 YPLTLGSNIGT-TTTAILAALASPR--EKLSSAFQIALCHFFFNISGI-LLWYVPCTR-  
ENSMUSP00000006638/1-601 YPLFLGSNIGT-TTTALLAALASPA--DMLIFAVQVALIHFFFNLG-ILLWYLVVLR-  
ENSAMEP00000017332/1-602 YPLFLGSNVGT-TTTALLAALASPA--DMLLSALQVALIHFFFNVAG-ILLWYVVPILR-  
ENSGGOP00000009414/1-639 YPLTLGSNIGT-TTTAILAALASPR--EKLSSAFQIALCHFFFNISGI-LLWYVPCTR-  
ENSCPOP00000008789/1-279 -----  
ENSLAFP00000009867/1-671 YPLTLGSNIGT-TTTSILAALASPG--N TMKSSLQIALCHFFFNVSGI-LLWYPIPLTR-  
ENSDARP00000123760/1-645 YPLTLGSNIGT-TTTAILAALASPK--EKLPAACQIALCHFFFNIFGI-LLWYFPPLTR-  
ENSRNOP00000050889/1-695 YPLTLGSNIGT-TTTAILAALASPG--N TLRSSLQIALCHFFFNISGI-LLWYPIPFTR-  
ENSSTOP00000007510/1-639 YPLTLGSNIGT-TTTAILAALASPK--EKLSSSFQIALCHFFFNISGI-LLWYPLPCTR-  
ENSPYP00000022223/1-395 -----ALQVALIHFFFNLG-ILLWYLVPALR-  
ENSONIP00000022669/1-655 YPLCLGSNIGT-TTTAILAAMASPG--ETLADALQIALVHFLFNISGI-ILWYPIPFTR-  
ENSCSAVP00000017377/1-567 YPLTLGSNIGT-TTTSILAALAQ----DEIANSLQIAFCHFFFNIFG-IAIWYPIPFMRN  
ENSM LUP00000006634/1-696 YPLTLGANIGT-TTTAIMAALASPG--KTLRSSLQIALCHFFFNITGI-LLWYPIPFTR-  
ENFCAP00000024839/1-589 YPLFLGSNIGT-TTTALLAALASPA--DMLLSALQVALIHFFFNLG-ILLWYVVPVLR-  
ENSSHAP00000010351/1-373 YPLTLGSNIGT-TTMAILAALASPG--STLEEFLOIALCHFFFNLG-VLWY-VPFMR-  
ENSP00000371483/1-690 YPLTLGSNIGT-TTTAILAALASPG--NALRSSLQIALCHFFFNISGI-LLWYPIPFTR-  
ENSCINP00000017268/1-531 YPLTLGANIGT-TTGTIFAALASDP--DRLEYSLOIALVHLFFNVSG-IALWYVPVFLRR  
ENSLAFP00000011155/1-512 YPLTLGSNIGT-TTTAILAALASPG--N TLKSSLQIALCHFFFNVSGI-LLWYPIPIIR-  
ENSM MUP00000027823/1-690 YPLTLGSNIGT-TTTAILAALASPG--N TLRSSLQIALCHFFFNISGI-LLWYPIPFTR-  
ENSECAP00000014904/1-639 YPLTLGSNIGT-TTTAILAALASPR--EKLSSAFQIALCHFFFNISGI-LLWYVPCTR-  
ENSLACP00000014496/1-661 YPLTLGSNIGT-TTTAILAAMASPG--ETLTNSLQIALCHFFFNISGI-LLWYVPVITR-  
ENSDORP00000004969/1-471 YPLTLGSNIGT-TTTAILAALASPR--EKLSSSFQ-----  
ENSDNOP00000010295/1-484 YPLTLGSNIGT-TATAILAALTSP--EKLSSAFQIALCHFFFNISGI-LLWYVPCTR-  
ENSCPOP00000016205/1-682 YPLTLGSNIGT-TTTAIMAALASPG--N TLSSIQIALCHFFFNISGI-LLWYPIPFTR-  
ENSOGAP00000005297/1-598 YPLFLGSNIGT-TTTALLAALASPA--DMMLSAVQVALIHFFFNLG-ILLWYLVPALR-  
ENSAMEP00000019136/1-693 YPLTLGSNIGT-TTTAILAALASPG--NALRSSLQIALCHFFFNISGI-ILWYPIPFTR-  
ENSORLP00000006343/1-600 YPLTLGSNIGT-TATALLAALASPG--NKLAAAIQIALCHLFFNIFGI-LLWYPIPFMR-  
ENSCINP00000022041/1-570 YPLTLGANIGT-TTTSILAALAQ----DEIANALQIAFCHFFFNIFG-II IWYPIPFMRN  
ENSACAP00000014198/1-675 YPLTLGSNIGT-TTTAILAALASPG--SRLKYSLOIALCHFFFNISGI-LLWYPIPFMR-  
ENSM MUP00000026048/1-639 YPLTLGSNIGT-TTTAILAALASPK--EKLFSAFQIALCHFFFNISGI-LLWYVPCTR-  
ENSEEUP00000009764/1-639 XXXXXXXXXXX-XXXXXXXXXXXX--XXXXXXXXXIAFCHFFFNISGI-LLWYVPCLR-  
ENSGALP00000023177/1-674 YPLTLGANIGT-TTTAILAALASPG--STLKYSLOIALCHFFFNVSGI-ILFYPLPFTR-  
ENSGMOP00000012872/1-556 YPLTLGSNIGT-TTTAILAAMAAPG--ETLANSLOIALCHFFFNIMGI-MLWYPIPFTR-  
ENSVAP00000002189/1-402 YPLTLGANIGT-TTTAILAALASPG--STLRSSIQ-----  
ENSLEP00000015536/1-600 YPLTLGSNIGT-TTTAILAALASPR--EKLSSAFQIALCHFFFNISGI-LLWYVPCTR-  
ENSMODP00000000391/1-706 YPLTLGSNIGT-TTTAILAALASPG--N TLQDSLQIALCHFFFNISGI-LLWYPIPFTR-  
ENSAPLP00000010975/1-470 YPLTLGSNIGT-TTTAILAALASPG--DKLASSFQIALCHFFFNISGI-LLWYPLPFTR-  
ENSOCUP00000002559/1-691 YPLTLGSNIGT-TTTAILAALASPG--N TLRSSLQIALCHFFFNISGI-LLWYPIPFTR-  
ENSTRP00000014558/1-599 YPLFLGSNIGT-TTTALLAALASPS--DMLISAVQVALIHFFFNLG-ILLWYVVPVLR-

ENSMUSP00000092380/1-697 YPLTLGSNIGT-TTTAILAALASPG--NTRSSLQIALCHFFFNISGI-LLWYPIPFTR-  
 ENSMAP0000003321/1-586 YPLTLGSNIGT-TTTALLAALASPG--ETLNNALQIALCHFFFNISGI-ILWYPIPQLR-  
 ENSFALP00000009572/1-675 YPLTLGANIGT-TTTAILAALASPG--STLKYSLQIALCHFFFNVSGI-ILFYPIPYTR-  
 ENSPCAP00000005454/1-388 XXXXXXXXXXX-XXXXXXXXXXXXXXXX-XXXXXXXXXIALCHFFFNISGI-LLWYPIPFTR-  
 ENSMPUP00000016619/1-693 YPLTLGSNIGT-TTTAILAALASPG--NTRSSLQIALCHFFFNISGI-MLWYPIPFTR-  
 ENSTGUP0000000400/1-502 YPLTLGSNIGT-TTTAILAALASPG--DKLASSFQIALCHFFFNISGI-LLWYPLPFTR-  
 ENSTRUP00000003108/1-212 ---LGSNIGT-TATSVLAAMASPG--DRRANALQISLVHFLFNISGI-LLWYVPVCTR-  
 ENSXMAP00000013891/1-643 YPLTLGSNIGT-TTTAILAAMASTG--DKLGNLQIALCHFFFNIMGI-LLWYPIPFMR-  
 ENSTNIP00000022970/1-600 YPLTLGSNIGT-TTTSILAAMASPG--ETLANSLQIALCHFFFNIFGI-VIWIPLPFMR-  
 ENSRNOP00000031764/1-637 YPLTLGSNIGT-TTTAILAALASPR--EKLSSSFQIALCHFFFNISGI-LLWYPLPCTR-  
 ENSOCUP00000002416/1-642 YPLTLGSNIGT-TTTAILAALASPR--EKLSSSFQIALCHFFFNISGI-LLWYPLPCTR-  
 ENSSHAP00000009641/1-569 YPLLLGSNIGT-TTTALLAALASPA--DKLLSAVQVSLIHVFFNMAG-ILLWYLVPALR-  
 ENSOPRP00000002451/1-601 YPLTLGSNIGT-TTTAILAALASPR--EKLASAFQIALCHFFFNISGI-LLWYPLPCMR-  
 ENSGALP00000004850/1-651 YPLTLGSNIGT-TTTAILAALASPG--DKLASSFQIALCHFFFNISGI-LLWYPLPFTR-  
 ENSXETP00000063986/1-676 YPLTLGSNIGT-TTTAILAALASPG--ETLQNSVQIALCHFFFNISGI-IWIYPIPFMR-  
 ENSETEP00000004829/1-591 YPLTLGSNIGT-TTTAILAALASPK--EKLPSVQIALCHFFFNISGI-LLWYVPVCTR-  
 ENSTRP00000009075/1-626 YPLTLGANIGT-TTTAILAALASPR--EKLSSAFQIALCHFFFNISGI-LLWYVPVCTR-  
 ENSLACP00000002539/1-596 YPLCLGSNLGT-TTTAILAALASPS--TTLNSAIQVALIHFFFNLSG-LALWYVVPILR-  
 ENSSARP00000008226/1-663 YPLTLGSNIGT-TTTAIMAALASPG--NTRSSLQIALCHFFFNISGI-LLWYPIPFTR-  
 ENSMODP00000000362/1-363 YPLTLGSNIGT-TTTTALLAALASPG--NTLQDSLQVRMH-----  
 ENSTRUP00000034707/1-643 YPLTLGSNIGT-TTTSILAAMASPG--DTLSDSLQIALCHFFIFNIMGI-LIWIYPIPFMR-  
 ENSBTAP000000027121/1-639 YPLTLGSNIGT-TTTAILAALASPR--EKLSSAFQIALCHFFFNISGI-LLWYPMPCTR-  
 ENSLAFP00000008447/1-639 YPLTLGSNIGT-TTTAILAALASPR--EKLPSAFQIALCHFFFNISGI-LLWYVPVCTR-  
 ENSOPRP00000001272/1-685 YPLTLGANIGT-TTTAILAALASPG--NTLKSSLQIALCHFFFNVSGI-LLWYPIPFTR-  
 ENSXMAP00000012278/1-531 YPLTLGSNLGT-TGTALLAALASRA--DKLAAATQVALCHFFFNLFGI-LLWYPIPATR-  
 ENSMUP00000015960/1-600 YPLLLGSNIGT-TTTALLAALASPA--DRMLSALQVALIHFFFNLG-ILLWYLVPALR-  
 ENSMICP00000009955/1-518 YPLFLGSNIGT-TTTALLAALASPA--DMMLSAVQVALIHFFFNLG-ILLWYLVPMR-  
 ENSRNOP00000014060/1-601 YPLFLGSNIGT-TTTALLAALASPA--DILLFAVQVALIHFFFNLG-ILLWYLVVLR-  
 ENSMEUP00000014025/1-569 YPLFLGSNVGT-TTTTLLAALASPA--DMLLSAVQVSLIHFFNMAGI-LLWYIVPAFR-  
 ENSTRUP00000002317/1-145 -----  
 ENSEUP00000010001/1-650 YPLTLGSNIGT-TTTAILAALASPG--DTMKSSLQIALCHLSFNVTGL-LLWYPIPFTR-  
 ENSPPYP00000018005/1-616 YPLTLGSNIGT-TTTAILAALASPR--EKLSSAFQIALCHFFFNISGI-LLWYVPVCTR-  
 ENSBTAP00000054408/1-578 VPTTVTIREGH-ASQGA----QAP--EALPPSLQVALIHFFFNLG-ILLWYVVPILR-  
 ENSMPUP00000015003/1-602 YPLLLGSNIGT-TTTALLAALASPA--DMLSALQVALIHFFFNLG-ILLWYVVPVLR-  
 ENSSSCP00000009335/1-671 YPLMLGANIGT-TTTAILAALASPG--DTLKSALQIALCHFFFNVGTI-VLWYPIPFAR-  
 ENSSHAP00000017419/1-642 YPLTLGSNIGT-TTTAILAALASPK--EKLSSAFQIALCHFFFNISGI-LLWYPLPCTR-  
 ENSVAP00000013085/1-639 YPLTLGSNIGT-TTTAILAALASPR--EKLSSAFQIALCHFFFNISGI-LLWYVPVCLR-  
 ENSECAP00000011338/1-693 YPLTLGSNIGT-TTTAILASLASPG--NTLKSSLQIALCHFFFNISGI-LLWYPIPFTR-  
 ENSORLP00000005426/1-631 YPLSLGSNIGT-TTTAILAAMASPG--ETLANALQIALVHFLFNISGI-VLWYPIPFTR-  
 ENSPCAP00000007551/1-624 YPLTLGSSNIGT-TTTAILASLVSP--KKLSSAFQIALCHFFFNILGI-LLWYVPVGM-  
 ENSCSAVP00000015098/1-558 YPLTLGANIGT-TTGTGIFTALASEP--ARLEYSLQVALVHFFNLG-IVLWYPIPILR-  
 ENSGMP00000005546/1-607 YPLSLGANIGT-TTTAILAAMASPG--ETLGNALQIALVHFLFNISGI-ILWYPIPFTR-  
 ENSBTAP00000002023/1-693 YPLTLGANIGT-TTTAILAALASPG--STLKSSLQIALCHFFFNISGI-ILWYPIPFTR-  
 ENSNLEP00000020480/1-712 YPLTLGSNIGT-TTTAILAALASPG--NALRSSIQIALCHFFFNISGI-LLWYPIPFTR-  
 ENSGGOP00000027080/1-590 YPLLLGSNIGT-TTTALLAALASPA--DRMLSALQVALIHFFFNLG-ILLWYLVPALR-  
 ENSALP00000007956/1-622 YPLTLGANIGT-TTTAILAALASPG--STLKYSLQIALCHFFFNVSGI-ILFYPLPFTR-  
 ENSTNIP00000008400/1-581 FGLPLGLPGS-PTLSILPIYSLYSLVLSKTSKIALVHFLFNISGI-LLWYVPVCTR-  
 ENSDORP00000015148/1-609 YPLTLGSNIGT-TTTAILAALASPG--NTLKSSLQIALCHFFFNISGI-LLWYPIPFTR-  
 ENSTBEP00000011496/1-366 -----  
 ENSCINP00000001618/1-539 YAVTVGANMGT-TLAVLAALATGN----SNALQLAFCHFFFNISG-FVIWYPIPFMR-  
 ENSLAFP00000006358/1-235 YPLFLGSNIGT-TTTALLAALATPS--NMLLSAVQVALIHFFLNLAG-ILLWYVVPALR-  
 ENSPCAP00000004466/1-598 YPLFLGSNIGT-TATALLAALASPA--DMLLSAVQVALIHFFLNLAG-ILLWYVVPALR-  
 ENSSTOP00000012949/1-602 YPLFLGSNIGT-TTTALLAALASPA--DMLLFAVQVALIHFFLNLAG-ILLWYLVPILR-  
 ENSCJAP00000051496/1-446 YPLLLGSNIGT-TTTALLAALASPA--DRIFSALQV-----  
 ENSMICP00000004615/1-516 YPLTLGSNIGT-TTTAILAALASPG--NTRLSALQIALCHFFFNISGI-LLWYPIPFTR-  
 ENSCAFP00000024163/1-639 YPLTLGSNIGT-TTTAILAALASPR--EKLSSAVQIALCHFFFNISGI-LLWYVPVCTR-  
 ENSPSIP00000018384/1-676 YPLTLGSNIGT-TTTAILAALASPG--STLKYSLQIALCHFFFNISGI-ILWYPIPFTR-

**Supplemental Table S-4: List of primers**

| Primer | Orientation | Location  | Sequence               |
|--------|-------------|-----------|------------------------|
| 22     | Reverse     | Intron 12 | AGGAGGTCTCAAGGGAGGAGA  |
| 32     | Forward     | Intron 4  | GAGGGCCAGCCAGGGACA     |
| 33     | Reverse     | Exon 13   | TCCAGAGAATGGAGCCAGAC   |
| 46     | Forward     | Exon 12   | CAGGGCTGACCCAGCATC     |
| 52     | Forward     | Intron 12 | CATCCACTTCTTCTTCAACCTG |
| 53     | Reverse     | Exon 13   | TCCAGAGAATGGAGCCAGAC   |
| 57     | Forward     | Intron 5  | GGGTGTCAGGCTGGCGGC     |
| 87     | Reverse     | Exon 7    | AGCATGGTGGCTGCTAAGC    |
| 276    | Reverse     | Exon 13   | CGCCGCTGCAGGACAGTAAC   |
| 734    | Forward     | Exon 6    | GTGTCAACGTAGGCACATCC   |
| 735    | Reverse     | Exon 7    | CAGTTGAAGATCCCGTGCAC   |

## REFERENCES

1. Bergwitz, C, Roslin, NM, Tieder, M, Loredó-Osti, JC, Bastepe, M, Abu-Zahra, H, Frappier, D, Burkett, K, Carpenter, TO, Anderson, D, Garabedian, M, Sermet, I, Fujiwara, TM, Morgan, K, Tenenhouse, HS, Juppner, H: SLC34A3 mutations in patients with hereditary hypophosphatemic rickets with hypercalciuria predict a key role for the sodium-phosphate cotransporter NaPi-IIc in maintaining phosphate homeostasis. *Am J Hum Genet*, 78: 179-192, 2006.
2. Wheeler, DL, Barrett, T, Benson, DA, Bryant, SH, Canese, K, Chetvernin, V, Church, DM, DiCuccio, M, Edgar, R, Federhen, S, Geer, LY, Helmsberg, W, Kapustin, Y, Kenton, DL, Khovayko, O, Lipman, DJ, Madden, TL, Maglott, DR, Ostell, J, Pruitt, KD, Schuler, GD, Schriml, LM, Sequeira, E, Sherry, ST, Sirotkin, K, Souvorov, A, Starchenko, G, Suzek, TO, Tatusov, R, Tatusova, TA, Wagner, L, Yaschenko, E: Database resources of the National Center for Biotechnology Information. *Nucleic Acids Res*, 34: D173-180, 2006.
3. Ichikawa, S, Tuchman, S, Padgett, LR, Gray, AK, Baluarte, HJ, Econs, MJ: Intronic deletions in the SLC34A3 gene: A cautionary tale for mutation analysis of hereditary hypophosphatemic rickets with hypercalciuria. *Bone*, in press, 2013.
4. Lorenz-Depiereux, B, Benet-Pages, A, Eckstein, G, Tenenbaum-Rakover, Y, Wagenstaller, J, Tiosano, D, Gershoni-Baruch, R, Albers, N, Lichtner, P, Schnabel, D, Hochberg, Z, Strom, TM: Hereditary Hypophosphatemic Rickets with Hypercalciuria Is Caused by Mutations in the Sodium-Phosphate Cotransporter Gene SLC34A3. *Am J Hum Genet*, 78: 193-201, 2006.
5. Ichikawa, S, Sorenson, AH, Imel, EA, Friedman, NE, Gertner, JM, Econs, MJ: Intronic Deletions in the SLC34A3 Gene Cause Hereditary Hypophosphatemic Rickets with Hypercalciuria. *J Clin Endocrinol Metab*, 91: 4022-4027, 2006.
6. Yu, Y, Sanderson, SR, Reyes, M, Sharma, A, Dunbar, N, Srivastava, T, Juppner, H, Bergwitz, C: Novel NaPi-IIc mutations causing HHRH and idiopathic hypercalciuria in several unrelated families: Long-term follow-up in one kindred. *Bone*, 50: 1100-1106, 2012.
7. Braithwaite, V, Pettifor, JM, Prentice, A: Novel SLC34A3 mutation causing hereditary hypophosphatemic rickets with hypercalciuria in a Gambian family. *Bone*, 53: 216-220, 2013.
8. Page, K, Bergwitz, C, Jaureguiberry, G, Harinarayan, CV, Insogna, K: A patient with hypophosphatemia, a femoral fracture, and recurrent kidney stones: report of a novel mutation in SLC34A3. *Endocr Pract*, 14: 869-874, 2008.

Fig. S-1A

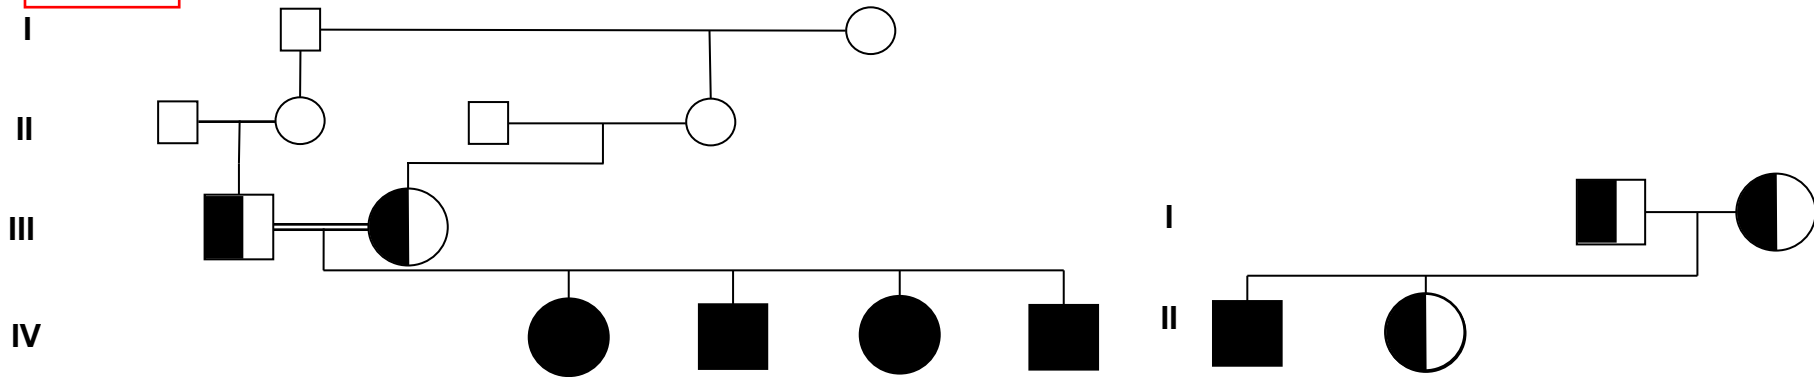

| Kindred                                | A                        |                         |                                 |                                 |                                  |                                  | B                                |                                 |                                 |                          |
|----------------------------------------|--------------------------|-------------------------|---------------------------------|---------------------------------|----------------------------------|----------------------------------|----------------------------------|---------------------------------|---------------------------------|--------------------------|
|                                        | A/III-1<br>34 y, 9 m     | A/III-2<br>29 y, 2 m    | A/IV-1 (index)<br>9 y, 1 m      | A/IV-2<br>7 y                   | A/IV-3<br>2 y, 4 m               | A/IV-4<br>1 y                    | B/II-2 (index)<br>13 y           | B/II-1<br>15 y                  | B/I-1<br>adult                  | B/I-2<br>adult           |
| Individual age                         |                          |                         |                                 |                                 |                                  |                                  |                                  |                                 |                                 |                          |
| ion. Ca (mmol/L)                       |                          |                         | 1.28<br>(1.10-1.35)             | 1.28<br>(1.10-1.35)             | 1.31<br>(1.10-1.35)              | <b>0.93</b><br>(1.10-1.35)       |                                  |                                 |                                 |                          |
| serum calcium (mmol/L)                 | 2.39<br>(2.10-2.55)      | 2.31<br>(2.10-2.55)     | 2.40<br>(2.40-2.65)             | 2.52<br>(2.40-2.65)             | 2.41<br>(2.40-2.65)              | <b>2.39</b><br>(2.40-2.65)       | 2.40<br>(2.40-2.65)              | 2.42<br>(2.38-2.63)             | 2.35<br>(2.10-2.65)             | 2.34<br>(2.10-2.65)      |
| serum phosphate (mmol/L)               | 1.02<br>(0.84-1.45)      | 0.86<br>(0.84-1.45)     | <b>0.77</b><br>(1.00-1.80)      | 1.15<br>(1.00-1.80)             | <b>0.87</b><br>(1.00-1.80)       | 1.26<br>(1.00-1.80)              | <b>0.90</b><br>(1.20-1.74)       | 1.27<br>(1.20-1.74)             | 0.95<br>(0.80-1.90)             | 1.02<br>(0.80-1.90)      |
| serum iPTH (pmol/L)                    |                          |                         | <b>1.48</b><br>(1.59-6.89)      | <b>1.27</b><br>(1.59-6.89)      | <b>1.06</b><br>(1.59-6.89)       | 2.55<br>(1.59-6.89)              | 1.70<br>(1.59-6.89)              | 3.30<br>(1.59-6.89)             | 5.90<br>(1.00-7.00)             | 6.20<br>(1.00-7.00)      |
| serum 25(OH)D (nmol/L)                 |                          |                         | <b>55.00</b><br>(62.40-199.68)  | 77.00<br>(62.40-199.68)         | <b>40.00</b><br>(62.40-199.68)   | <b>19.00</b><br>(62.40-199.68)   | 71.00<br>(51.00-250.00)          | 78.00<br>(51.00-250.00)         | 73.00<br>(51.00-250.00)         | 51.00<br>(51.00-250.00)  |
| serum 1,25(OH) <sub>2</sub> D (pmol/L) |                          |                         | 155.00<br>(48.00-160.00)        | 130.00<br>(48.00-160.00)        | 99.00<br>(48.00-160.00)          | 90.00<br>(48.00-160.00)          | <b>419.00</b><br>(60.00-158.00)  | <b>218.00</b><br>(60.00-158.00) | <b>172.00</b><br>(60.00-158.00) | 149.00<br>(60.00-158.00) |
| serum creatinine (μmol/L)              | 92.00<br>(59.00-104.00)  | 59.00<br>(45.00-84.00)  | 39.00<br>(33.00-68.00)          | 44.00<br>(33.00-56.00)          | 24.00<br>(20.0-42.00)            | 31.00<br>(20.00-65.00)           | 60.00<br>(30.50-61.01)           | <b>75.00</b><br>(38.13-68.63)   | 90.00<br>(61.01-99.14)          | 75.00<br>(61.01-99.14)   |
| U-Ca/Crea (mol/mol)                    | 0.19<br>(<0.62)          | 0.38<br>(<0.62)         | <b>0.86</b><br>(<0.85)          | 0.65<br>(<0.85)                 | <b>1.35</b><br>(<1.00)           | 0.52<br>(<1.27)                  | 0.71<br>(<0.73)                  | 0.31<br>(<0.73)                 | 0.30<br>(<0.45)                 | 0.12<br>(<0.45)          |
| TmP/GFR (mmol/L)                       |                          |                         |                                 |                                 |                                  |                                  | 0.98<br>(0.77-1.29)              |                                 |                                 |                          |
| TRP(%)                                 | <b>89.00</b><br>(>90.00) | 91.40<br>(>90.00)       | <b>82.00</b><br>(>90.00)        | 95.30<br>(>90.00)               | <b>87.00</b><br>(>90.00)         | 92.50<br>(>90.00)                | <b>84.00</b><br>(>90.00)         | <b>85.00</b><br>(>90.00)        | <b>77.00</b><br>(>90.00)        | 89.00<br>(>90.00)        |
| serum ALP (U/L)                        | 71.00<br>(40.00-130.00)  | 72.00<br>(35.00-105.00) | <b>725.00</b><br>(86.00-300.00) | <b>342.00</b><br>(69.00-300.00) | <b>492.00</b><br>(104.00-300.00) | <b>320.00</b><br>(104.00-300.00) | <b>699.00</b><br>(182.00-587.00) | 157.00<br>(138.00-511.00)       | 71.00<br>(50.00-350.00)         | 68.00<br>(50.00-350.00)  |
| bone involvement                       | N                        | N                       | <b>Y</b>                        | N                               | <b>Y</b>                         | N                                | <b>Y</b>                         | N                               | N                               | N                        |
| renal involvement                      | N                        | N                       | <b>Y</b>                        | <b>Y</b>                        | N                                | N                                | N                                | N                               | N                               | N                        |
| c.1369G>A (p.G457S)                    | +                        |                         | +                               | +                               | +                                | +                                |                                  | +                               |                                 |                          |
| c.560+27_561-38del                     |                          |                         |                                 |                                 |                                  |                                  |                                  |                                 |                                 |                          |
| c.1357delTTC (p. F453del)              |                          |                         |                                 |                                 |                                  |                                  | +                                | +                               | +                               | +                        |

Fig. S-1B

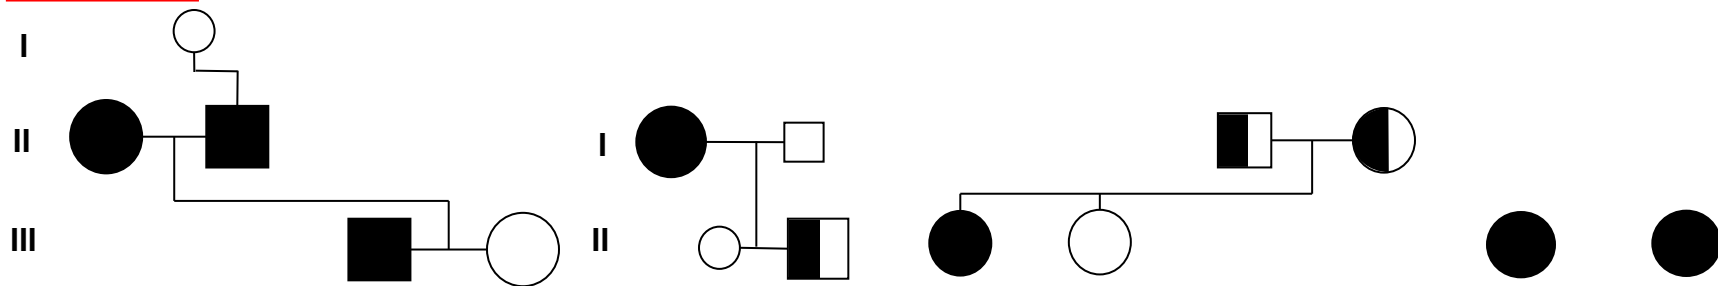

| Kindred                          | C                    |                         |                              |                       | D                        |                   | E                           |                         |                          |                    | Case F                     | Case G                      |
|----------------------------------|----------------------|-------------------------|------------------------------|-----------------------|--------------------------|-------------------|-----------------------------|-------------------------|--------------------------|--------------------|----------------------------|-----------------------------|
| Individual age                   | C/II-1 adult         | C/II-2 adult            | C/III-1 (index) 4 y, 11 m    | C/III-2 3 y           | D/I-1(index) 27 y, 7 m   | D/II-1 12 m       | E/II-2 (index) 13 y         | E/II-1 15 y             | E/I-1 45 y               | E/I-2 42 y         | F/II-1 5 y, 9 m            | G/II-1 10 y, 3 m            |
| ion. Ca (mmol/L)                 |                      |                         |                              |                       |                          |                   | 1.27 (1.15-1.33)            |                         |                          |                    |                            |                             |
| Ca (mmol/L)                      | 2.45 (2.13-2.63)     | 2.38 (2.13-2.63)        | 2.40 (2.13-2.63)             | 2.43 (2.13-2.63)      |                          | 2.42 (2.20-2.60)  | 2.33 (2.2-2.6)              | 2.58 (2.2-2.6)          | 2.22 (2.2-2.6)           | 2.14 (2.2-2.6)     | 2.57 (2.4-2.65)            | 2.6 (2.4-2.65)              |
| P (mmol/L)                       | 1.13 (0.87-1.45)     | 1.03 (0.87-1.45)        | <b>1.00</b> (1.39-1.74)      | 1.39 (1.39-1.74)      | <b>0.775</b> (0.81-1.45) | 1.59 (1.39-1.74)  | <b>1.1</b> (1.29-1.68)      | <b>1</b> (1.13-1.58)    | <b>0.8</b> (0.81-1.45)   | 1.1 (0.81-1.45)    | <b>1.11</b> (1.20-1.74)    | 1.26 (1.20-1.74)            |
| PTH (pmol/L)                     | 13.47 (5.30-34.99)   | 12.94 (5.30-34.99)      |                              | 11.03 (5.30-34.99)    | <b>0.74</b> (1.06-5.83)  |                   | <b>0.64</b> (1.06-6.89)     | <b>0.46</b> (1.06-6.89) | 3.92 (1.06-6.89)         | 1.27 (1.06-6.89)   | <b>1.38</b> (1.59-6.89)    | <b>0.32</b> (1.59-6.89)     |
| 25(OH)D (nmol/L)                 |                      |                         | 84.86 (24.96-169.73)         |                       | 48.6 (40-130)            | 70 (80-120)       | 119 (25-125)                | 99 (25-125)             | 63 (25-125)              | 62 (25-125)        | <b>24.21</b> (62.4-199.68) | <b>44.928</b> (62.4-199.68) |
| 1,25(OH) <sub>2</sub> D (pmol/L) | 67.60 (52.00-163.80) | 135.20 (52.00-163.80)   | <b>343.20</b> (52.00-163.80) | 122.20 (52.00-163.80) | <b>178</b> (35-140)      | 172 (55-190)      | <b>436.8</b> (26.00-156.00) | 119.6 (26.00-156.00)    | 145.6 (26.00-156.00)     | 104 (26.00-156.00) | 174.2 (62.4-223.6)         | <b>283.4</b> (62.4-223.6)   |
| Crea (μmol/L)                    |                      |                         |                              |                       | 51 (60-124)              | <b>12</b> (20-60) | <b>55</b> (30.50-53.38)     | <b>72</b> (30.50-53.38) | <b>103</b> (45.76-83.89) | 74 (61.01-99.14)   | 28.979 (15.25-38.13)       | <b>76.26</b> (30.50-53.38)  |
| Ca/Crea (mol/mol)                | 0.31 (<0.57)         | 0.28 (<0.57)            | <b>1.64</b> (<1.00)          | 0.39 (<1.00)          | <b>0.92</b> (<0.45)      |                   | <b>1.03</b> (<0.74)         | 0.67 (<0.74)            | 0.11 (<0.45)             | <b>0.5</b> (<0.45) | <b>1.56</b> (<0.85)        | <b>2.75</b> (<0.85)         |
| TmP/GFR (mmol/L)                 | 1.08 (0.89-1.08)     | <b>0.86</b> (0.89-1.08) | 0.74 ND                      | 1.42 ND               |                          |                   | 1.18 (0.77-1.29)            | 0.77 (0.77-1.29)        | <b>0.7</b> (0.77-1.29)   | 0.9 (0.77-1.29)    |                            | <b>1.08</b> (1.17-1.54)     |
| TRP(%)                           | 90.00 (>90.00)       | <b>85.00</b> (>90.00)   | <b>76.00</b> (>90.00)        | 92.00 (>90.00)        | <b>88</b> (>90.00)       |                   | 107 (>90.00)                | 77 (>90.00)             | 88 (>90.00)              | 82 (>90.00)        |                            | 92 (>90.00)                 |
| ALP (U/L)                        |                      |                         |                              |                       | 74 (39-117)              | 223 (40-390)      | 966 (150-900)               | 510 (150-900)           | 210 (50-276)             | 240 (50-276)       |                            | 358 (215-476)               |
| bone involvement                 | N                    | N                       | Y                            | N                     | Y                        | N                 | N                           | N                       | N                        | N                  | N                          | N                           |
| renal involvement                | N                    | Y                       | Y                            | N                     | N                        | N                 | Y                           | N                       | N                        | Y                  | Y                          | Y                           |
| c.413C>T                         | +                    |                         | +                            |                       | +                        |                   |                             |                         |                          |                    |                            |                             |
| c.1304delG                       |                      | +                       | +                            |                       | +                        |                   |                             |                         |                          |                    |                            |                             |
| c.1579_81del                     |                      |                         |                              | +                     |                          |                   |                             |                         |                          |                    |                            |                             |
| c.575C>T                         |                      |                         |                              |                       |                          |                   |                             |                         |                          |                    |                            |                             |
| g.2615_2699del                   |                      |                         |                              |                       |                          |                   | +                           | +                       |                          | +                  |                            |                             |
| c.367delC                        |                      |                         |                              |                       |                          |                   |                             |                         |                          |                    | +                          |                             |
| c.1402C>T                        |                      |                         |                              |                       |                          | +                 | +                           | +                       |                          |                    |                            | +                           |

**Fig. S-2**

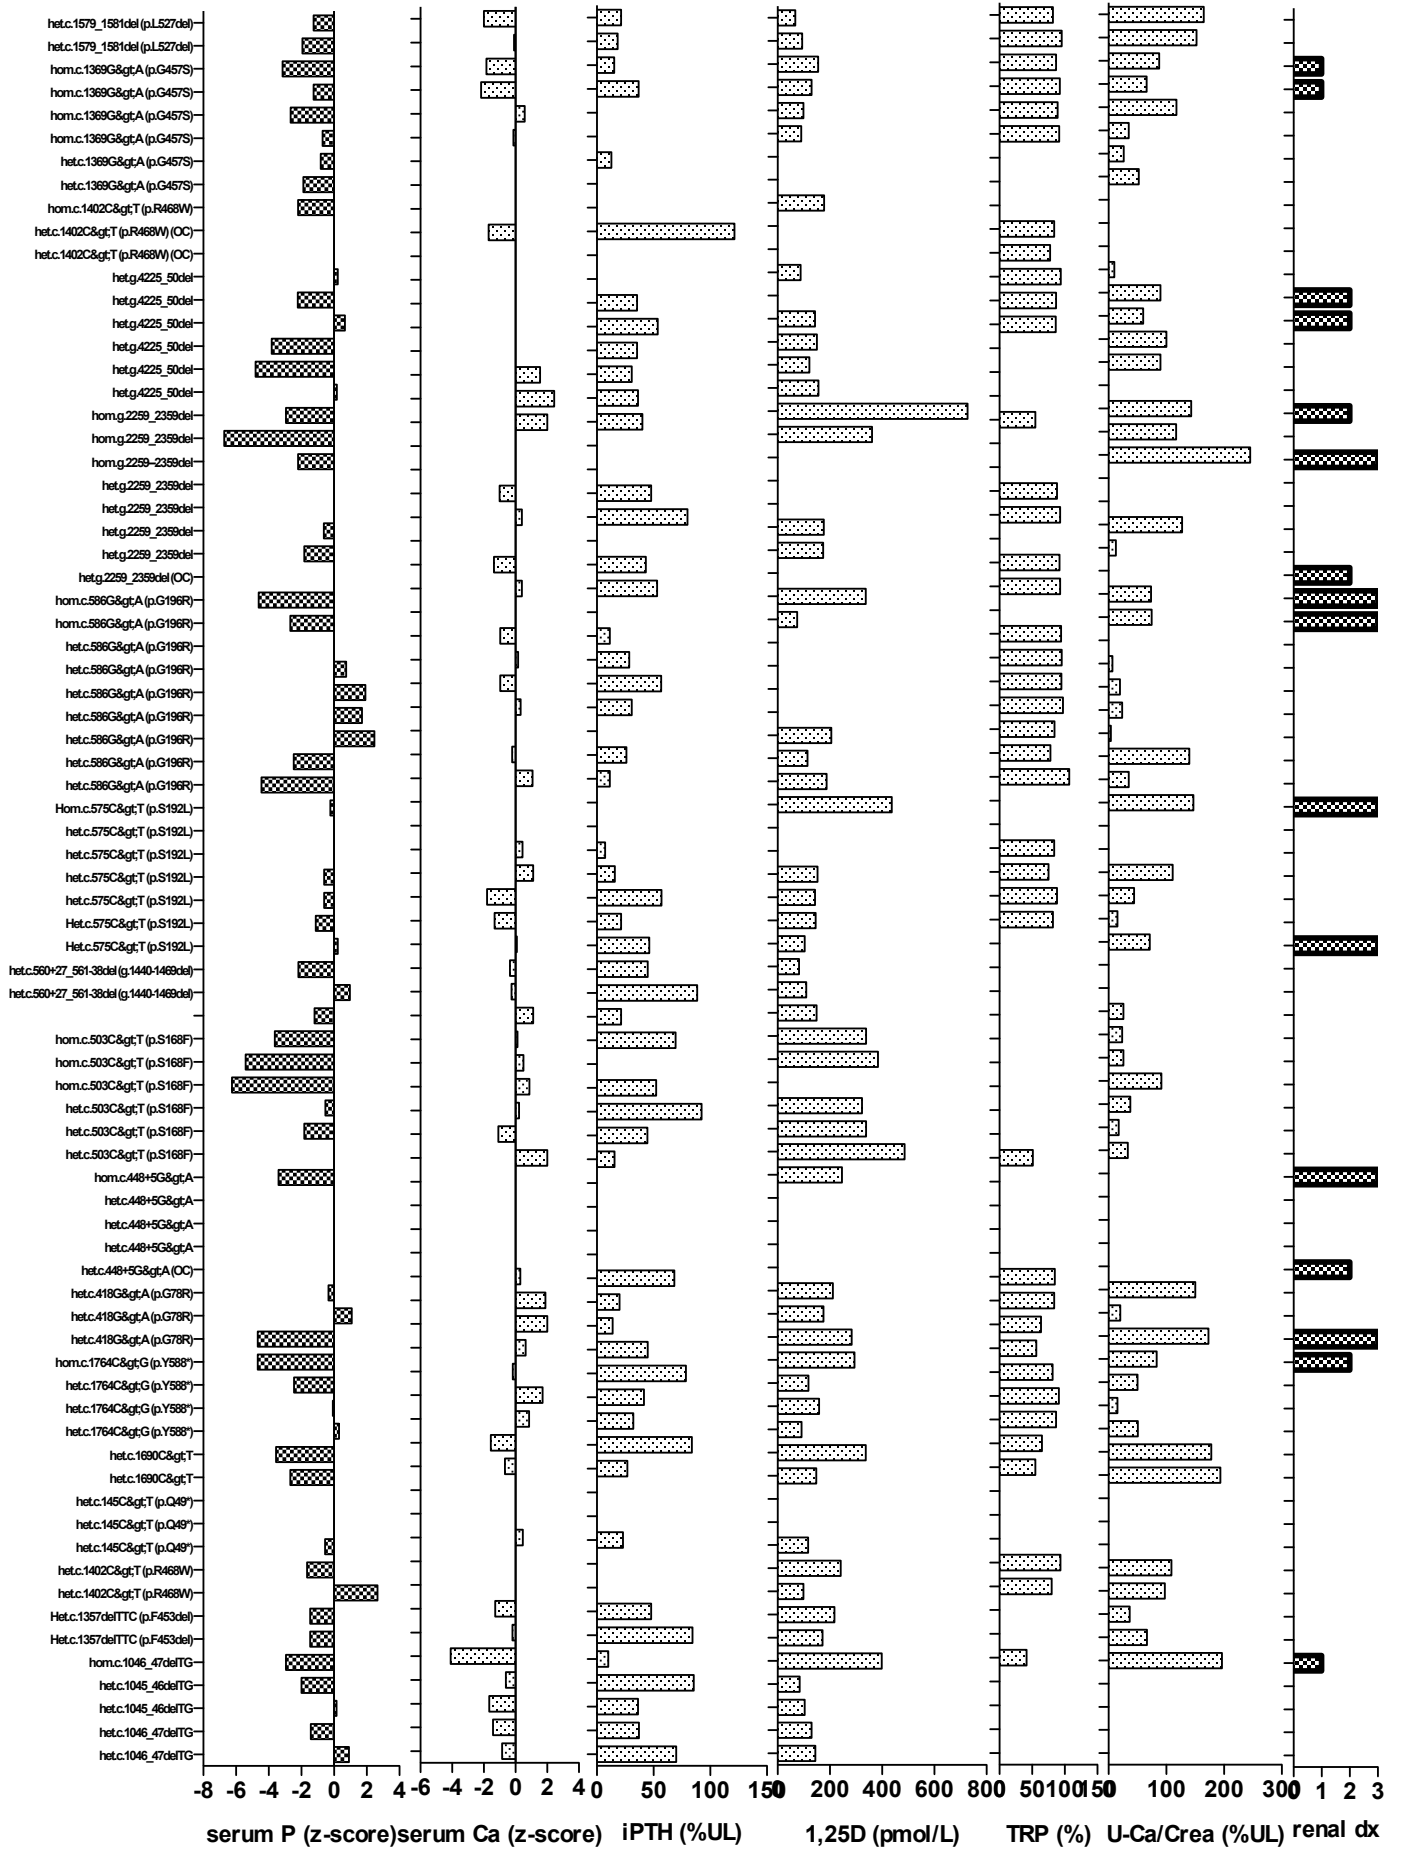

Supplement: ASN.2013101085_ASN2013101085SupplementaryData1.pdf [file ASN.2013101085_ASN2013101085SupplementaryData1.pdf]
